# Supplementary material for: Pharmacokinetics and Pharmacodynamics of Key Components of a Standardized Centella asiatica Product in Cognitively Impaired Older Adults: A Phase 1, Double-Blind, Randomized Clinical Trial
Source: MDPI journal article supplement (doi:10.3390/antiox11020215), 2022-01-23
Supplement: s1 [file s1]

## Supplementary Material

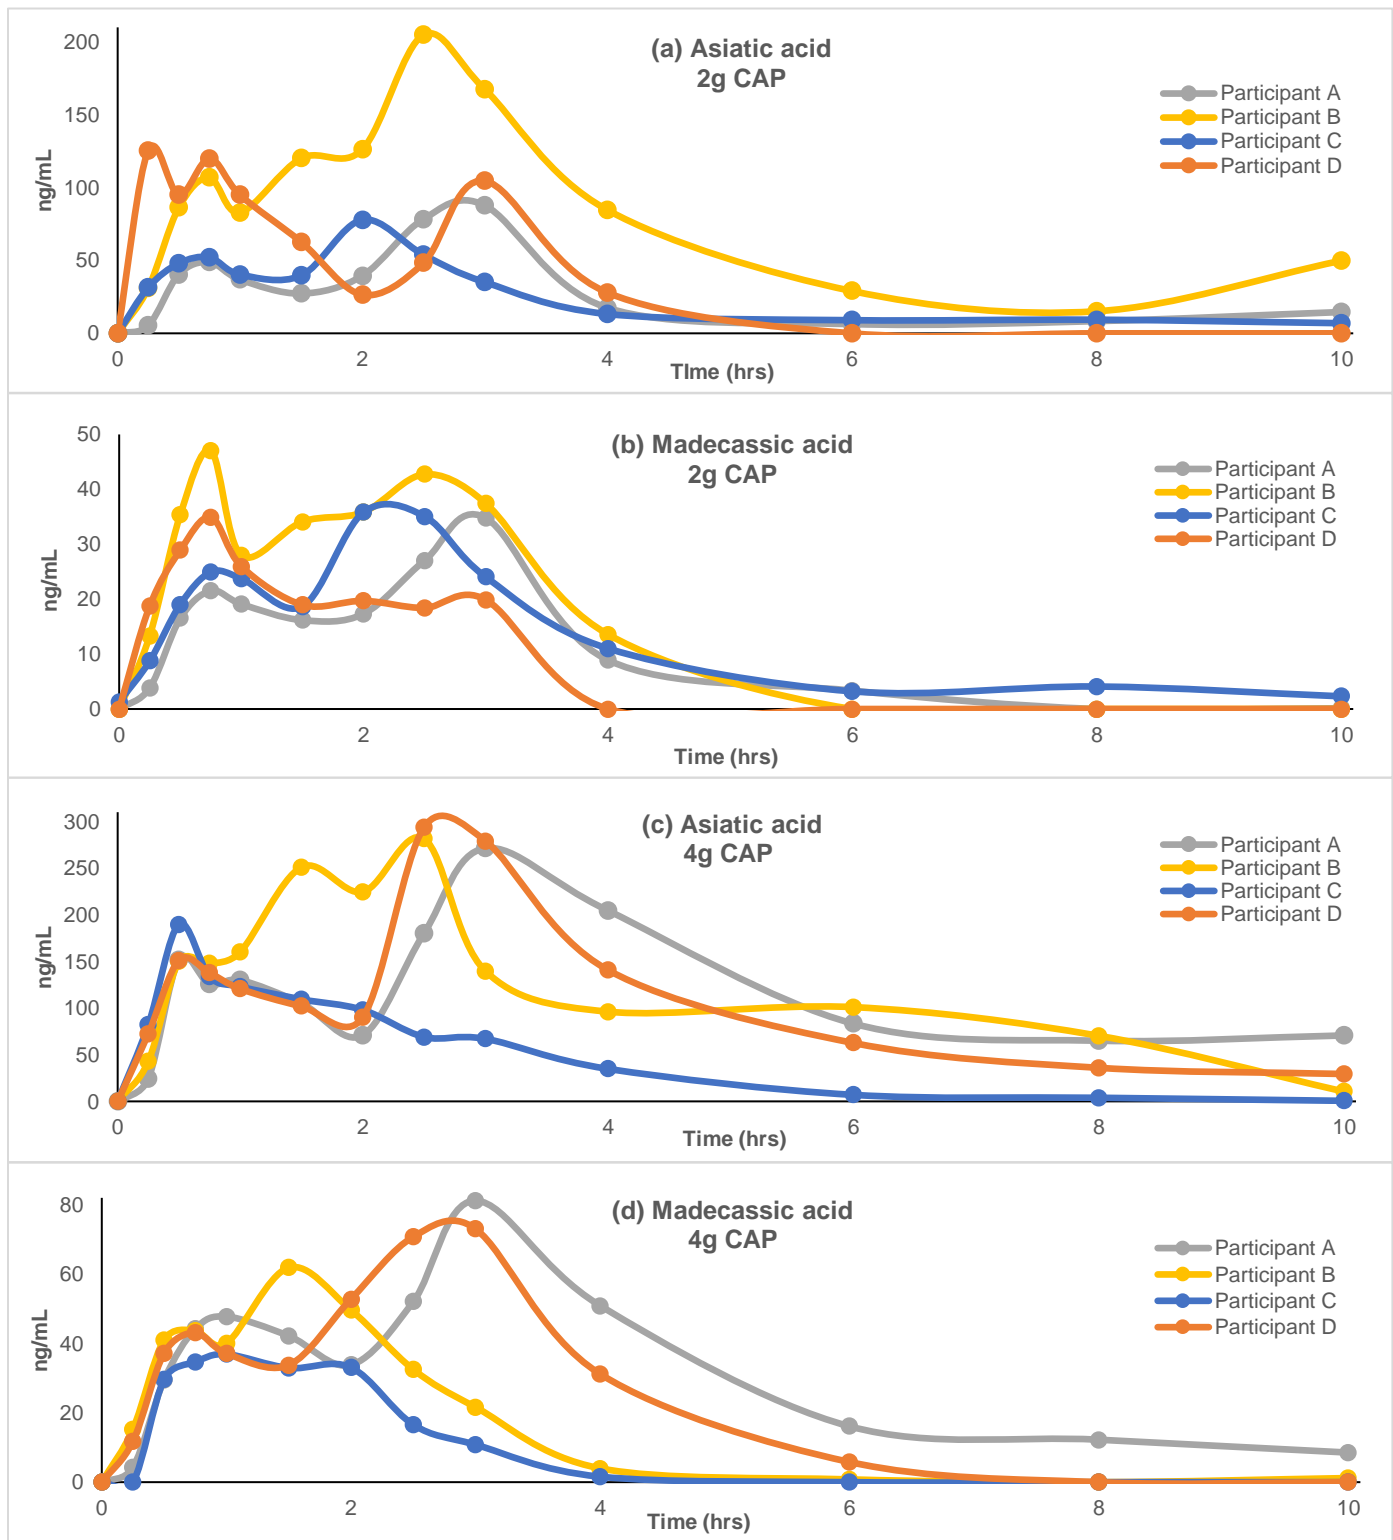

**Figure S1.** Individual plasma concentration-time profiles of triterpene aglycones derived from *Centella asiatica* water extract product (CAP) in cognitively impaired older adults on cholinesterase inhibitor therapy; (a) asiatic acid following single oral administration of 2 g CAP; (b) madecassic acid following single oral administration of 2 g CAP; (c) asiatic acid following single oral administration of 4 g CAP, (d) madecassic acid following single oral administration of 4 g CAP.
